# Supplementary material
Source: HighWire-hosted journal article supplement (https://www.cmajopen.ca/highwire/filestream/81011/field_highwire_adjunct_files/2/open-2015-0087-original-submission.pdf)
Supplement: open-2015-0087-original-submission.pdf [file open-2015-0087-original-submission.pdf]

# Emergency department use by persons with HIV in Ontario: a population-based study

## Short title: Emergency department use by persons with HIV

Ryan Ng MSc<sup>1</sup>; Claire E. Kendall MD, PhD<sup>1,2,3,4</sup>; Ann N. Burchell PhD<sup>1,5,6</sup>; Ahmed M. Bayoumi MD, MSc<sup>1,7,8,9,10</sup>; Mona R. Loutfy MD, MPH<sup>1,9,10,11</sup>; Janet Raboud PhD<sup>1,6,12</sup>; Richard H. Glazier MD, MPH<sup>1,6,7,8,9,13</sup>; Sean Rourke PhD<sup>5,7,14</sup>; Tony Antoniou PhD<sup>1,7,13</sup>

<sup>1</sup>Institute for Clinical Evaluative Sciences, Toronto, Ontario; <sup>2</sup>Department of Family Medicine, University of Ottawa, Ottawa, Ontario; <sup>3</sup>CT Lamont Primary Health Care Research Centre, Bruyere Research Institute, Ottawa, Ontario; <sup>4</sup>Ottawa Hospital Research Institute, Ottawa, Ontario; <sup>5</sup>Ontario HIV Treatment Network, Toronto, Ontario; <sup>6</sup>Dalla Lana School of Public Health, University of Toronto, Toronto, Ontario; <sup>7</sup>Li Ka Shing Knowledge Institute, St. Michael's Hospital, Toronto, Ontario; <sup>8</sup>Centre for Research on Inner City Health, St. Michael's Hospital, Toronto, Ontario, Canada; <sup>9</sup>Institute of Health Policy, Management and Evaluation, University of Toronto, Toronto, Ontario; <sup>10</sup>Department of Medicine, University of Toronto, Toronto, Ontario; <sup>11</sup>Women's College Research Institute, Women's College Hospital, Toronto, Ontario; <sup>12</sup>Toronto General Research Institute, University Health Network, Toronto, Ontario; <sup>13</sup>Department of Family and Community Medicine, St. Michael's Hospital and University of Toronto, Toronto, Ontario; <sup>14</sup>Department of Psychiatry, University of Toronto, Toronto, Ontario

**Correspondence:** Tony Antoniou,  
410 Sherbourne Street, Toronto, ON M4X 1K2, Canada  
Tel: 416-867-7460 ext. 8344      email: [tantoniou@smh.ca](mailto:tantoniou@smh.ca)

**Text count:** 2986

**Abstract Word Count:** 249

## Background

Emergency department utilization may reflect poor access to primary care. However, there are few contemporary studies describing emergency department use among persons with HIV. Our objectives were to compare rates and causes of emergency department utilization between adults living with and without HIV.

## Methods

We conducted a population-based study of Ontario residents living with and without HIV between April 1, 2011 and May 31, 2012. We frequency matched adults with HIV to four HIV-negative individuals on age, sex and census division, and compared rates of emergency department utilization using random effects multivariable negative binomial regression. We classified visits as low-urgency or high-urgency, and also examined visits for ambulatory care sensitive conditions. Hospitalization following an emergency department visit was a secondary outcome.

## Results

We studied 14,534 persons with HIV and 58,136 HIV-negative individuals. Rates of emergency department utilization were higher for persons with HIV (67.3 versus 31.2 visits per 100 person-years; adjusted rate ratio 1.58, 95% confidence interval 1.51 to 1.65). Similar results were observed for low-urgency visits. With the exception of hypertension, visit rates for ambulatory care sensitive conditions were higher for persons with HIV. Persons with HIV were also more likely to be hospitalized following an emergency department visit (adjusted odds ratio 1.55; 95% confidence interval 1.43 to 1.69).

## Conclusion

Compared with HIV-negative individuals, persons with HIV have higher rates of emergency department utilization, including potentially avoidable visits. Optimizing timely access to appropriate community-based care may prevent a significant proportion of emergency department utilization in this population.

Confidential

## INTRODUCTION

Emergency department utilization, particularly for non-urgent conditions, is a frequently used indicator of access to primary care.<sup>1</sup> Understanding patterns of emergency department utilization is therefore necessary for optimizing resource allocation and identifying possible gaps in outpatient care. Yet, in contrast to studies examining inpatient and outpatient healthcare use,<sup>2-6</sup> comparatively few contemporary studies exist examining emergency department utilization among persons with HIV.<sup>7-11</sup> Studies conducted in the years preceding the introduction of combination antiretroviral therapy demonstrated that persons with HIV had rates of emergency department visits that were three- to four-fold higher than those of the general population.<sup>12,13</sup> Although subsequent studies found persistently heightened rates of emergency department utilization following the introduction of combination antiretroviral therapy, inferences were limited by samples that were small and not population-based in nature.<sup>7,9,10</sup> A recent analysis of the United States National Hospital Ambulatory Medical Survey demonstrated that rates of emergency department room visits in persons with HIV continue to exceed those of non-infected persons (633 vs 438 visits per 1000 persons), although by a smaller magnitude than during the preceding decade.<sup>14</sup>

Analagous population-based studies characterizing emergency department utilization among persons with HIV in a Canadian setting are lacking. These data are important for several reasons. First, findings generated in the United States are of limited generalizability to the Canadian context because Canadians have access to universally insured and publicly-financed health care; consequently, emergency room use should not be influenced by health insurance status. In addition, persons with HIV are disproportionately disadvantaged by socioeconomic and structural factors that are associated with poor access to primary care.<sup>15</sup> In this context, high rates

1  
2  
3 of emergency room use for conditions that could be potentially managed in ambulatory settings  
4 could be emblematic of poor access to primary care and highlight gaps in the community-based  
5 management of these patients. Accordingly, we compared rates and causes of emergency  
6 department utilization between adults living with and without HIV in Ontario, Canada. We  
7 examined risk of admission following emergency room visits as a secondary outcome. In light of  
8 previously published research, we speculated that persons with HIV would have higher rates of  
9 emergency department utilization, including potentially avoidable visits, than HIV-negative  
10 individuals.  
11  
12  
13  
14  
15  
16  
17  
18  
19  
20  
21  
22  
23  
24  
25

## 26 **METHODS**

### 27 28 29 **Setting**

30  
31 We conducted a population-based study comparing rates of emergency room visits between  
32 adults aged 18 years and older who were living with and without HIV infection in Ontario,  
33 Canada, between April 1, 2011 and March 31, 2012. This study was approved by the Research  
34 Ethics Board of Sunnybrook Health Sciences Centre, Toronto, Ontario.  
35  
36  
37  
38  
39  
40  
41  
42  
43

### 44 **Data Sources**

45  
46 We used Ontario's administrative health databases, which were held securely in linkable files  
47 without any direct personal identifiers, and analyzed at the Institute for Clinical Evaluative  
48 Sciences. We identified adults living with HIV using the Ontario HIV Database, an  
49 administrative data registry of Ontario residents with diagnosed HIV infection which was  
50 generated using a validated case-finding algorithm.<sup>16</sup> The definition of three physician claims  
51  
52  
53  
54  
55  
56  
57  
58  
59  
60

1  
2  
3 with an International Classification of Diseases, Ninth Revision code for HIV infection (042,  
4 043, 044) within a three year period has a sensitivity and specificity of 96.2% (95% confidence  
5 intervals [CI] 95.2% to 97.9%) and 99.6% (95% CI 99.1% to 99.8%), respectively, for  
6 identifying persons living with HIV.<sup>16</sup> We obtained hospitalization and emergency department  
7 data from the Canadian Institute for Health Information's Discharge Abstract Database and  
8 National Ambulatory Care Reporting System (NACRS), respectively. The NACRS database  
9 contains detailed clinical information regarding all emergency room visits in Ontario. Recorded  
10 data elements include patient demographic variables, service dates and up to 10 diagnostic codes  
11 [International Statistical Classification of Diseases and Related Health Problems 10th Revision  
12 (ICD-10)], one of which must be designated as the 'main problem', or the most clinically  
13 significant reason for the patient's visit to the emergency room. We used the Ontario Health  
14 Insurance Plan database to identify claims for physician services, and used validated disease  
15 registries to define the presence of diabetes, hypertension, chronic obstructive pulmonary  
16 disease, congestive heart failure and asthma.<sup>17-21</sup> We obtained basic demographic and date of  
17 death data from the Registered Persons Database, a registry of all Ontario residents eligible for  
18 health insurance.

#### 43 Study population

44  
45  
46 We used the Registered Persons Database to identify all adults in Ontario aged 18 years and over  
47 who were alive and eligible for health insurance as of the index date of the study, April 1, 2011.  
48 From within this cohort, we identified individuals who had been diagnosed with HIV using the  
49 Ontario HIV Database. To create a control group that was similar with respect to characteristics  
50 that might influence emergency department utilization, we frequency matched a random sample  
51  
52  
53  
54  
55  
56  
57  
58  
59  
60

1  
2  
3 of HIV-negative residents on age, sex and census division in Ontario to persons with HIV in a  
4 ratio of 4:1.  
5  
6  
7  
8  
9

## 10 Outcomes

11  
12 The number of emergency department room visits, person-time at risk and rates of overall  
13 emergency room utilization were determined for people living with and without HIV for the  
14 study period. We computed emergency department utilization rates as the total number of visits  
15 occurring during the study period divided by the total person-years of follow-up in the period.  
16 For individuals who died or moved away from Ontario during follow-up, we used an offset to  
17 censor their observation at the date of death or migration, respectively, such that these  
18 individuals only contributed a fraction of a person-year to the rate calculation. We used the ‘main  
19 problem’ field in each record to determine the diagnosis most responsible for the visit, and  
20 aggregated similar diagnoses into organ- or disease-based categories according to ICD-10 codes.  
21  
22  
23  
24  
25  
26  
27  
28  
29  
30  
31  
32  
33  
34  
35

36 We defined potentially avoidable visits in two ways. First, we used the Canadian Triage and  
37 Acuity Scale (CTAS), a standardized measure of the immediacy with which a patient presenting  
38 to an emergency department requires care, to categorize emergency room visits as ‘low-urgency’  
39 or ‘high-urgency’, as has been done in previous studies.<sup>22,23</sup> Specifically, we considered visits  
40 that were triaged as CTAS 4 (less urgent) or 5 (non-urgent) as ‘low-urgency’, or representing  
41 visits for conditions that could have been potentially managed in ambulatory settings. In  
42 contrast, we classified visits triaged as CTAS 1 (resuscitation required), 2 (emergent care  
43 required) or 3 (urgent care required) as ‘high-urgency’ and likely non-preventable. Second, we  
44 calculated rates of emergency room visits for ambulatory care sensitive conditions, defined as  
45  
46  
47  
48  
49  
50  
51  
52  
53  
54  
55  
56  
57  
58  
59  
60

1  
2  
3 those conditions for which emergency department use could be potentially avoided with timely  
4 and regular access to outpatient care.<sup>24</sup> We classified conditions as being ambulatory care  
5 sensitive using definitions from the literature and the Canadian Institute for Health  
6 Information.<sup>24-29</sup>  
7  
8  
9  
10  
11  
12  
13  
14

15 In a separate analysis, we compared the risk of hospital admission following an emergency  
16 department room visit between persons with and without HIV. To ensure comparability in the  
17 distribution of factors that may predispose to hospitalization following an emergency department  
18 visit, we frequency matched each visit resulting in hospitalization among persons with HIV to  
19 four such visits among non-HIV-infected individuals on patient age, sex and census division  
20 within Ontario.  
21  
22  
23  
24  
25  
26  
27  
28  
29  
30  
31

### 32 Statistical Analysis

33  
34 We computed standardized differences to examine intergroup balance in the distribution of  
35 baseline variables. Standardized differences of less than 0.1 indicate good balance between  
36 groups for a given covariate.<sup>30</sup>  
37  
38  
39  
40  
41  
42  
43

44 For the primary analysis, we compared rates of emergency department utilization between  
45 persons with and without HIV using random-effects negative binomial regression models to  
46 account for the correlation among matched groups. To examine the association between HIV  
47 infection and hospital admission following an emergency department room visit, we used  
48 generalized estimating equations with a logit link function and exchangeable correlation  
49 structure. We adjusted models for variables that could influence emergency department  
50  
51  
52  
53  
54  
55  
56  
57  
58  
59  
60



1  
2  
3 utilization and risk of subsequent hospitalization, including the number of primary care physician  
4 visits during the prior year, urban versus rural residence, socioeconomic status and patient co-  
5 morbidity in the year preceding the index date. We determined patient socioeconomic status at  
6 the neighborhood level using postal code information and Statistics Canada census data. We used  
7 the Johns Hopkins Adjusted Clinical Groups Case-Mix System to adjust for differences in  
8 comorbidity burden in the year preceding the index date.<sup>31</sup> This system uses diagnostic  
9 information from administrative databases to describe and predict use of health care resources. In  
10 this study, we used Aggregated Diagnosis Groups (ADGs), which are clusters of diagnostic  
11 codes that are similar in terms of severity and expected persistence. The number of ADGs ranges  
12 from 0 to a maximum of 32, with a higher number reflecting a higher level of co-morbidity. We  
13 also generated Resource Utilization Bands (RUBs), which are aggregations of age-sex diagnostic  
14 groups associated with different levels of expected resource use, ranging from 0 (lowest expected  
15 health care use) to 5 (highest expected health care use), to compare patients based on their  
16 expected use of health care resources. Because of collinearity between ADGs and RUBs, we  
17 adjusted models only for the former. For the hospital admission models, we also adjusted for  
18 severity of presenting symptoms according to CTAS score, whether the emergency department  
19 was located within an academic teaching hospital and emergency department volume, classified  
20 into tertiles as low, medium or high. Because we speculated a priori that patients with HIV  
21 would be at heightened risk of admission regardless of visit severity, we examined the  
22 interaction between HIV status and CTAS score in a separate model. All analyses were  
23 conducted using SAS version 9.3 (SAS institute, Cary, North Carolina, USA).  
24  
25  
26  
27  
28  
29  
30  
31  
32  
33  
34  
35  
36  
37  
38  
39  
40  
41  
42  
43  
44  
45  
46  
47  
48  
49  
50  
51  
52  
53  
54

## 55 RESULTS

56  
57  
58  
59  
60

1  
2  
3 We identified 14,534 persons with HIV and 58,136 matched HIV-negative individuals. The  
4 mean age was 46.4 years (SD  $\pm$  11.0 years), and approximately 20% were women (Table 1).  
5  
6 Collectively, these individuals contributed 72,043 person-years of follow-up and made 27,637  
7  
8 visits to the emergency department between April 1, 2011 and March 31, 2012, of which 9,670  
9  
10 (35.0%) were attributable to persons with HIV. Compared with HIV-negative individuals,  
11  
12 persons with HIV had a greater comorbidity burden as reflected by the number of ADGs and had  
13  
14 more physician visits in the year preceding the index date (Table 1). Overall, 4,065 (28.0%; 95%  
15  
16 confidence interval, 27.2% to 28.7%) persons with HIV made at least one visit to an emergency  
17  
18 department during the study period, compared with 10,252 HIV-negative individuals (17.6%;  
19  
20 95% confidence interval, 17.3% to 17.9%).  
21  
22  
23  
24  
25  
26  
27

28 Following multivariable adjustment, the rate of emergency department visits was higher in  
29  
30 persons with HIV relative to HIV-negative patients (67.3 versus 31.2 visits per 100 person-years;  
31  
32 adjusted rate ratio 1.58; 95% confidence interval 1.51 to 1.65) (Table 2). The unadjusted rates of  
33  
34 the most common causes of emergency room visits are shown in supplemental Table 1.  
35  
36

37 Compared with HIV-negative individuals, persons with HIV had strikingly higher rates of  
38  
39 emergency room visits related to infectious diseases (87.27 versus 21.55 visits per 1000 person-  
40  
41 years; rate ratio 4.05, 95% confidence interval 3.74 to 4.38) and mental health illness (62.21  
42  
43 versus 19.73 visits per 1000 person-years; rate ratio 3.15, 95% confidence interval 2.89 to 3.44).  
44  
45

46 The most frequent (n = 1,069; 42.8%) infectious causes of emergency room utilization were skin  
47  
48 and soft tissue infections, with rates of 36.67 and 9.40 visits per 1000 person-years among  
49  
50 persons with and without HIV, respectively (rate ratio 3.90, 95% confidence interval 3.46 to  
51  
52 4.40). Visits where HIV was designated as the main problem accounted for 14.9% (n = 187) of  
53  
54 infectious diseases related visits among persons with HIV. The most common mental health  
55  
56  
57  
58  
59  
60

1  
2  
3 diagnoses for persons with HIV were related to alcohol and substance use, with rates of 34.86  
4 visits per 1000 person-years, compared with 7.73 visits per 1000 person-years among HIV-  
5  
6  
7  
8  
9  
10 negative individuals (rate ratio 4.51, 95% confidence interval 3.97 to 5.12).

11 We observed similar results when stratifying according to visit acuity. Specifically, persons with  
12  
13  
14  
15  
16  
17  
18  
19  
20  
21  
22  
23  
24  
25  
26  
27  
28  
29  
30  
31  
32  
33  
34  
35  
36  
37  
38  
39  
40  
41  
42  
43  
44  
45  
46  
47  
48  
49  
50  
51  
52  
53  
54  
55  
56  
57  
58  
59  
60  
HIV had higher rates of visits that were categorized as ‘low-urgency’ (22.3 versus 11.2 visits per  
100 person-years; adjusted rate ratio 1.55, 95% confidence interval 1.45 to 1.65) and high  
urgency (44.9 versus 19.9 visits per 100 person-years; adjusted rate ratio 1.61, 95% confidence  
interval 1.53 to 1.69) (supplemental Table 2). In addition, with the exception of hypertension,  
emergency room utilization rates for ambulatory care sensitive conditions were higher among  
persons with HIV (Table 3).

To compare the risk of hospitalization following an emergency department visit, we frequency  
matched 9,670 emergency room visits made by persons with HIV to 38,670 visits made by HIV-  
negative individuals on age, sex and geographic residence within the province. Although the  
distribution of visits by CTAS score was similar between the two groups (Table 4), the  
proportion of visits resulting in hospitalization was higher among persons with HIV (15.6%;  
95% confidence interval 14.9% to 16.4%) than HIV-negative individuals (9.6%; 95% confidence  
interval 9.3% to 9.9%). Following multivariable regression, persons with HIV were at greater  
risk of being admitted to hospital than HIV-negative individuals (adjusted odds ratio 1.55; 95%  
confidence interval 1.43 to 1.69) (Table 5). In an analysis stratified by CTAS score, persons with  
HIV were more likely to be admitted to hospital at all levels of visit severity, with the exception  
of CTAS 1 (resuscitation required) (Figure 1).

## DISCUSSION

In our population-based study, we observed higher rates of emergency department utilization among persons with HIV relative to a matched sample of HIV-negative individuals. We found consistent results when considering emergency room utilization for less urgent visits. We also found higher odds of hospital admission among persons with HIV, including for visits triaged as less urgent. Our study suggests that developing community-based interventions that promote access to outpatient-based mental health care, substance use treatment, oral health care and timely primary care could reduce the burden of potentially preventable emergency room visits among persons with HIV.

Our findings build upon those of other recently published studies. Specifically, rates of emergency department utilization in our study are similar to those of a US study comparing emergency room use among a nationally representative sample of persons with and without HIV.<sup>14</sup> However, persons with HIV in that study were less likely to have private insurance than HIV-negative individuals, whereas our findings, arising from a publicly funded health care system, should not be influenced by such disparities. Our results are also similar to those of a Canadian study of 438 HIV-infected injection drug users, in that the cumulative incidence of emergency department use during the one year study period was 63.7%, with skin and soft tissue infections accounting for 17.6% of visits.<sup>11</sup> However, our study was population-based in nature, and therefore included all individuals with HIV who had entered care, including those who have never injected drugs.

1  
2  
3 Several intersecting mechanisms may explain our findings. First, previous research has shown  
4 that low socioeconomic status is associated with greater use of emergency departments for  
5 conditions amenable to outpatient management.<sup>23</sup> Although matching on geographic residence  
6 mitigated between-group differences in socioeconomic status, our previous work has  
7 demonstrated that persons with HIV are disproportionately represented in low income  
8 neighborhoods and are more socially and economically marginalized when measures of  
9 neighborhood instability and material deprivation are examined.<sup>32,33</sup> In addition, ecologic  
10 measures of socioeconomic status may not wholly capture the detrimental impact of social  
11 determinants such as food and housing insecurity, stigma and unemployment on health outcomes  
12 and health services utilization. These challenges are faced by up to 50% of Ontario residents with  
13 HIV and have been associated with poor health outcomes and heightened rates of emergency  
14 department utilization in several studies.<sup>34-38</sup> Second, our finding of high rates of mental health  
15 and substance use related emergency room visits could be explained by earlier work highlighting  
16 a greater relative burden of mental health related morbidity among Ontario residents with HIV  
17 and less engagement in continuous HIV outpatient care among individuals with a history of  
18 injection drug use.<sup>39,40</sup> Although higher rates of infectious diseases related visits among persons  
19 with HIV are not unexpected, only a minority of visits were related to underlying HIV infection.  
20 In contrast, skin and soft tissue infections accounted for the majority of these episodes in persons  
21 with HIV, possibly reflecting complications of injection drug use among susceptible  
22 individuals.<sup>11</sup> Finally, a higher prevalence of physical and mental health multimorbidity among  
23 persons with HIV relative to the general Ontario population could account for the higher odds of  
24 hospitalization following an emergency room visit among these patients, particularly for  
25 conditions triaged as less urgent and non-urgent.<sup>39</sup>  
26  
27  
28  
29  
30  
31  
32  
33  
34  
35  
36  
37  
38  
39  
40  
41  
42  
43  
44  
45  
46  
47  
48  
49  
50  
51  
52  
53  
54  
55  
56  
57  
58  
59  
60

1  
2  
3 Our findings are strengthened by the population-based nature of our data, thereby allowing us to  
4 examine all Ontario residents with HIV who have entered care. However, our study has some  
5 limitations. We used administrative databases and did not have access to laboratory data,  
6 including viral load and CD4 cell count. Similarly, we did not have reliable data on antiretroviral  
7 use. However, as noted earlier, there were few visits attributable to underlying HIV infection,  
8 and an earlier study did not find an association between these indices and emergency department  
9 use in persons with HIV.<sup>11</sup> Although triage level and ambulatory care sensitive conditions are  
10 routinely used as indicators of potentially preventable emergency department visits, these visits  
11 may not always be avoidable, even with timely access to primary care. Finally, we could not  
12 identify individuals with undiagnosed HIV and/or persons with HIV who have not linked to care;  
13 we hypothesize that emergency department visit rates would be higher in that population.  
14  
15  
16  
17  
18  
19  
20  
21  
22  
23  
24  
25  
26  
27  
28  
29  
30  
31

32 In conclusion, we found higher rates of emergency department utilization among people with  
33 HIV relative to the general Ontario population, including for conditions that could be potentially  
34 managed in outpatient settings. These findings have important implications for future research  
35 and the management of persons with HIV. Most notably, our findings provide a rationale for  
36 interventions to strengthen access to comprehensive primary care, community-based mental  
37 health and drug and alcohol treatment services for persons with HIV. In addition, integration of  
38 wound care management into existing harm reduction services may prevent visits for skin and  
39 soft tissue infections associated with injection drug use. Because emergency room utilization for  
40 less urgent conditions is associated with an inability to access timely primary care, we  
41 recommend further research to understand impediments to procuring such care among persons  
42 with HIV. Overall, these efforts will contribute to a more complete understanding of the reasons  
43  
44  
45  
46  
47  
48  
49  
50  
51  
52  
53  
54  
55  
56  
57  
58  
59  
60

1  
2  
3 underlying the observed disparities in emergency department utilization and ultimately inform  
4 programming which optimizes primary care engagement and chronic disease management for  
5  
6 persons with HIV.  
7  
8  
9

### 10 11 12 **Competing interests**

13  
14  
15 None of the authors have competing interests related to this work.  
16  
17  
18  
19

### 20 21 **Funding**

22 This study was funded as an Applied Health Research Question through the Institute for Clinical  
23 Evaluative Sciences (ICES), which is funded by an annual grant from the Ontario Ministry of  
24 Health and Long-Term Care (MOHLTC). The sponsors had no role in the design or conduct of  
25 the study; in the collection, analysis or interpretation of the data; or in the preparation, review or  
26 approval of the manuscript. The opinions, results and conclusions reported in this paper are those  
27 of the authors and are independent from the funding source. No endorsement by ICES or the  
28 Ontario MOHLTC is intended or should be inferred.  
29  
30  
31  
32  
33  
34  
35  
36  
37  
38  
39

40  
41 Tony Antoniou is supported by a New Investigator Award from the Canadian Institutes for  
42 Health Research-Ontario HIV Treatment Network. Ann N. Burchell is supported by a New  
43 Investigator Award from the Canadian Institutes for Health Research. Mona Loutfy is the  
44 recipient of salary support from Women's College Hospital, the University of Toronto and the  
45 Women's College Research Institute. Janet Raboud is supported by an Ontario HIV Treatment  
46 Network Career Scientist Award and the Skate the Dream Fund, Toronto and Western Hospital  
47  
48  
49  
50  
51  
52  
53  
54  
55  
56  
57  
58  
59  
60

1  
2  
3 Foundation. Richard H. Glazier is a Clinician Scientist in the Department of Family and  
4  
5 Community Medicine of St. Michael's Hospital and the University of Toronto.  
6  
7  
8  
9

10 **Author contributions**

11  
12 All authors contributed to the concept and design of the study. Ryan Ng and Tony Antoniou  
13  
14 acquired the data, and all authors were involved in the analysis and interpretation of the data.  
15  
16  
17 Ryan Ng and Tony Antoniou drafted the manuscript, and all authors were involved in critical  
18  
19 revision of the manuscript. All authors approved the manuscript submitted for publication. Ryan  
20  
21 Ng and Tony Antoniou provided administrative, technical or material support. Tony Antoniou is  
22  
23 the guarantor for the manuscript.  
24  
25  
26  
27  
28  
29  
30  
31  
32  
33  
34  
35  
36  
37  
38  
39  
40  
41  
42  
43  
44  
45  
46  
47  
48  
49  
50  
51  
52  
53  
54  
55  
56  
57  
58  
59  
60



**REFERENCES**

1. McCusker J, Roberge D, Lévesque JF, Ciampi A, Vadeboncoeur A, Larouche D, et al. Emergency department visits and primary care among adults with chronic conditions. *Med Care* 2010;48:972-80.
2. Bachhuber MA, Southern WN. Hospitalization rates of people living with HIV in the United States, 2009. *Public Health Rep* 2014;129:178-86.
3. Antoniou T, Zagorski B, Loutfy MR, Strike C, Glazier RH. Socio-economic- and sex-related disparities in rates of hospital admission among patients with HIV infection in Ontario: a population-based study. *Open Med* 2012;6:e146-54.
4. Yehia BR, Fleishman JA, Hicks PL, Ridore M, Moore RD, Gebo KA. Inpatient health services utilization among HIV-infected adult patients in care 2002-2007. *J Acquir Immune Defic Syndr* 2010;53:397-404.
5. Kendall CE, Wong J, Taljaard M, Glazier RH, Hogg W, Younger J, et al. A cross-sectional, population-based study of HIV physicians and outpatient health care use by people with HIV in Ontario. *BMC Health Serv Res* 2015;15:63.
6. Fleishman JA, Moore RD, Conviser R, Lawrence PB, Korthuis PT, Gebo KA. Associations between outpatient and inpatient service use among persons with HIV infection: a positive or negative relationship? *Health Serv Res* 2008;43(1 Pt 1):76-95.
7. Kerr J, Duffus WA, Stephens T. Relationship of HIV care engagement to emergency department utilization. *AIDS Care* 2014;26:547-53.

- 1  
2  
3 8. Shih TY, Chen KF, Rothman RE, Hsieh YH. US national estimation of emergency  
4 department utilization by patients given 'HIV/AIDS-related illness' as their primary  
5 diagnosis. *HIV Med* 2011;12:343-51.  
6  
7
- 8  
9  
10  
11 9. Josephs JS, Fleishman JA, Korthuis PT, Moore RD, Gebo KA; HIV Research Network.  
12 Emergency department utilization among HIV-infected patients in a multisite multistate  
13 study. *HIV Med* 2010;11:74-84.  
14  
15
- 16  
17  
18  
19 10. Venkat A, Shippert B, Hanneman D, Nesbit C, Piontkowsky DM, Bhat S, et al.  
20 Emergency department utilization by HIV-positive adults in the HAART era. *Int J Emerg*  
21 *Med* 2008;1:287-96.  
22  
23
- 24  
25  
26  
27 11. Fairbairn N, Milloy MJ, Zhang R, Lai C, Grafstein E, Kerr T, et al. Emergency  
28 department utilization among a cohort of HIV-positive injecting drug users in a Canadian  
29 setting. *J Emerg Med* 2012;43:236-43.  
30  
31
- 32  
33  
34  
35 12. Bozzette S, Berry S, Duan N, et al. The care of HIV-infected adults in the United States.  
36 HIV Cost and Services Utilization Study Consortium. *N Engl J Med* 1998;339:1897-  
37 1904.  
38  
39
- 40  
41  
42  
43 13. McCaig L, Stussman B. National Hospital Ambulatory Medical Care Survey: 1996  
44 emergency department summary. *Adv Data* 1997;293:1-20.  
45  
46
- 47  
48  
49 14. Mohareb AM, Rothman RE, Hsieh YH. Emergency department (ED) utilization by HIV-  
50 infected ED patients in the United States in 2009 and 2010 – a national estimation. *HIV*  
51 *Med* 2013;14:605-13.  
52  
53  
54  
55  
56  
57  
58  
59  
60

- 1  
2  
3 15. Higa DH, Marks G, Crepaz N, Liao A, Lyles CM. Interventions to improve retention in  
4  
5 HIV primary care: a systematic review of U.S. studies. *Curr HIV/AIDS Rep* 2012;9:313-  
6  
7 25.  
8  
9
- 10  
11 16. Antoniou T, Zagorski B, Loutfy MR, Strike C, Glazier RH. Validation of case-finding  
12  
13 algorithms derived from administrative data for identifying adults living with human  
14  
15 immunodeficiency virus infection. *PLoS One* 2011;6:e21748.  
16  
17
- 18  
19 17. Hux JE, Ivis F, Flintoft V, Bica A. Diabetes in Ontario: determination of prevalence and  
20  
21 incidence using a validated administrative data algorithm. *Diabetes Care* 2002;25:512-6.  
22  
23
- 24 18. Tu K, Campbell NR, Chen ZL, Cauch-Dudek KJ, McAlister FA. Accuracy of  
25  
26 administrative databases in identifying patients with hypertension. *Open Med*  
27  
28 2007;1:e18-26.  
29  
30
- 31 19. Gershon AS, Wang C, Guan J, Vasilevska-Ristovska J, Cicutto L, To T. Identifying  
32  
33 patients with physician-diagnosed asthma in health administrative databases. *Can Respir*  
34  
35 *J* 2009;16:183-8.  
36  
37
- 38  
39 20. Gershon AS, Wang C, Guan J, Vasilevska-Ristovska J, Cicutto L, To T. Identifying  
40  
41 individuals with physician diagnosed COPD in health administrative databases. *COPD*  
42  
43 2009;6:388-94.  
44  
45
- 46  
47 21. Schultz SE, Rothwell DM, Chen Z, Tu K. Identifying cases of congestive heart failure  
48  
49 from administrative data: a validation study using primary care patient records. *Chronic*  
50  
51 *Dis Inj Can* 2013;33:160-6.  
52  
53
- 54  
55 22. Murray M, Bullard M, Grafstein E. Revisions to the Canadian emergency department  
56  
57 triage and acuity scale implementation guidelines. *CJEM* 2004;6:421-7.  
58  
59  
60

- 1  
2  
3 23. Khan Y, Glazier RH, Moineddin R, Schull MJ. A population-based study of the  
4  
5 association between socioeconomic status and emergency department utilization in  
6  
7 Ontario, Canada. *Acad Emerg Med* 2011;18:836-43.  
8  
9
- 10  
11 24. Billings J, Zeitel L, Lukomnik J, Carey TS, Blank AE, Newman L. Impact of  
12  
13 socioeconomic status on hospital use in New York City. *Health Aff (Millwood)*  
14  
15 1993;15:239-49.  
16  
17
- 18  
19 25. Canadian Institute for Health Information. *Health Indicators 2013: Definitions, Data*  
20  
21 *Sources and Rationale*, May 2013. Ottawa, ON: CIHI; 2013.  
22  
23
- 24  
25 26. Roos LL, Walld R, Uhanova J, Bond R. Physician visits, hospitalizations, and  
26  
27 socioeconomic status: ambulatory care sensitive conditions in a Canadian setting. *Health*  
28  
29 *Serv Res* 2005;40:1167-85.  
30  
31
- 32  
33 27. Brown AD, Goldacre MJ, Hicks N, Rourke JT, McMurtry RY, Brown JD, et al.  
34  
35 Hospitalization for ambulatory care-sensitive conditions: a method for comparative  
36  
37 access and quality studies using routinely collected statistics. *Can J Public Health*  
38  
39 2001;92:155-59.  
40  
41
- 42  
43 28. Johnson PJ, Ghildayal N, Ward AC, Westgard BC, Boland LL, Hokanson JS. Disparities  
44  
45 in potentially avoidable emergency department (ED) care: ED visits for ambulatory care  
46  
47 sensitive conditions. *Med Care* 2012;50:1020-8.  
48  
49
- 50  
51 29. Falik M, Needleman J, Wells BL, Korb J. Ambulatory care sensitive hospitalizations and  
52  
53 emergency visits: experiences of Medicaid patients using federally qualified health  
54  
55 centers. *Med Care* 2001;39:551-61.  
56  
57  
58  
59  
60

- 1  
2  
3  
4  
5  
6  
7  
8  
9  
10  
11  
12  
13  
14  
15  
16  
17  
18  
19  
20  
21  
22  
23  
24  
25  
26  
27  
28  
29  
30  
31  
32  
33  
34  
35  
36  
37  
38  
39  
40  
41  
42  
43  
44  
45  
46  
47  
48  
49  
50  
51  
52  
53  
54  
55  
56  
57  
58  
59  
60
30. Austin PC, Grootendorst P, Anderson GM. A comparison of the ability of different propensity score models to balance measured variables between treated and untreated subjects: a Monte Carlo study. *Stat Med* 2007;26:734-53.
  31. Johns Hopkins University. Johns Hopkins ACG Case-Mix Adjustment System. Available at: <http://www.ach.jhsph.org>.
  32. Antoniou T, Zagorski B, Bayoumi AM, Loutfy MR, Strike C, Raboud J, et al. Trends in HIV prevalence, new HIV diagnoses, and mortality among adults with HIV who entered care in Ontario, 1996/1997 to 2009/2010: a population-based study. *Open Med* 2013;7:e98-106.
  33. Antoniou T, Zagorski B, Macdonald EM, Bayoumi AM, Raboud J, Brophy J, et al. Trends in live birth rates and adverse neonatal outcomes among HIV-positive women in Ontario, Canada, 2002- 2009: a descriptive population-based study. *Int J STD AIDS* 2014;25:960-6.
  34. AIDS Bureau, Ontario Ministry of Health and Long-Term Care, Public Health Agency of Canada, Nunavut Regional Office. Ontario Community HIV/AIDS Reporting Tool (OCHART) 2011. Available at: [https://www.ochart.ca/documents/Resources\\_Reports.htm](https://www.ochart.ca/documents/Resources_Reports.htm). Accessed June 7, 2015.
  35. Wang EA, McGinnis KA, Fiellin DA, Goulet JL, Bryant K, Gibert CL, et al. Food insecurity is associated with poor virologic response among HIV-infected patients receiving antiretroviral medications. *J Gen Intern Med* 2011;26:1012-8.

- 1  
2  
3  
4  
5  
6  
7  
8  
9  
10  
11  
12  
13  
14  
15  
16  
17  
18  
19  
20  
21  
22  
23  
24  
25  
26  
27  
28  
29  
30  
31  
32  
33  
34  
35  
36  
37  
38  
39  
40  
41  
42  
43  
44  
45  
46  
47  
48  
49  
50  
51  
52  
53  
54  
55  
56  
57  
58  
59  
60
36. Weiser SD, Hatcher A, Frongillo EA, Guzman D, Riley ED, Bangsberg DR, et al. Food insecurity is associated with greater acute care utilization among HIV-infected homeless and marginally housed individuals in San Francisco. *J Gen Intern Med* 2013;28:91-8.
37. Kushel MB, Gupta R, Gee L, Haas JS. Housing instability and food insecurity as barriers to health care among low-income Americans. *J Gen Intern Med* 2006;21:71-7.
38. Sayles JN, Wong MD, Kinsler JJ, Martins D, Cunningham WE. The association of stigma with self-reported access to medical care and antiretroviral therapy adherence in persons living with HIV/AIDS. *J Gen Intern Med* 2009;24:1101-8.
39. Kendall CE, Wong J, Taljaard M, Glazier RH, Hogg W, Younger J, et al. A cross-sectional, population-based study measuring comorbidity among people living with HIV in Ontario. *BMC Public Health* 2014;14:161.
40. Burchell AN, Gardner S, Light L, Ellis B, Antoniou T, Bacon J, et al. Engagement in HIV care among persons enrolled in a clinical HIV cohort in Ontario, Canada, 2001-2011. *J Acquir Immune Defic Syndr* 2015 (in press).

**Table 1: Baseline characteristics of persons with HIV and frequency matched sample of HIV-negative individuals, 2011-2012**

| Covariate                                      | HIV<br>(n = 14,534) | Non-HIV<br>(n = 58,136) | Standardized<br>Difference |
|------------------------------------------------|---------------------|-------------------------|----------------------------|
| Mean age ± standard deviation (years)          | 46.4 ± 11.0         | 46.4 ± 11.0             | 0.00                       |
| 18 to 25 years                                 | 355 (2.4%)          | 1,427 (2.5%)            |                            |
| 26 to 35 years                                 | 1,927 (13.3%)       | 7,703 (13.2%)           |                            |
| 36 to 45 years                                 | 4,468 (30.7%)       | 17,933 (30.8%)          |                            |
| 46 to 55 years                                 | 5,175 (35.6%)       | 20,609 (35.4%)          |                            |
| >55 years                                      | 2,609 (18.0%)       | 10,464 (18.0%)          |                            |
| Sex                                            |                     |                         |                            |
| Female                                         | 2,858 (19.7%)       | 11,432 (19.7%)          | 0.00                       |
| Male                                           | 11,676 (80.3%)      | 46,704 (80.3%)          |                            |
| Neighborhood income quintile                   |                     |                         |                            |
| 5 (highest)                                    | 2,241 (15.4%)       | 11,065 (19.0%)          | 0.20                       |
| 4                                              | 2,171 (14.9%)       | 10,012 (17.2%)          |                            |
| 3                                              | 2,348 (16.2%)       | 10,533 (18.1%)          |                            |
| 2                                              | 2,999 (20.6%)       | 12,391 (21.3%)          |                            |
| 1 (lowest)                                     | 4,555 (31.3%)       | 13,606 (23.4%)          |                            |
| Rural residence                                | 628 (4.3%)          | 2,898 (5.0%)            | 0.03                       |
| Primary care physician visits in the past year |                     |                         |                            |
| Mean ± standard deviation                      | 6.0 ± 8.9           | 3.3 ± 5.2               | 0.43                       |
| Median (IQR)                                   | 4 (1 to 7)          | 2 (0 to 4)              |                            |
| Aggregated diagnostic groups                   |                     |                         |                            |
| Mean ± standard deviation                      | 4.3 ± 3.1           | 2.7 ± 2.5               | 0.61                       |
| Median (IQR)                                   | 4 (2 to 6)          | 2 (1 to 4)              |                            |
| Resource utilization band                      |                     |                         |                            |
| Non-users                                      | 856 (5.9%)          | 13,032 (22.4%)          | 1.12                       |
| Healthy users                                  | 204 (1.4%)          | 4,942 (8.5%)            |                            |
| Low resource utilization                       | 566 (3.9%)          | 13,778 (23.7%)          |                            |
| Moderate resource utilization                  | 8,809 (60.6%)       | 22,868 (39.3%)          |                            |
| High resource utilization                      | 2,869 (19.7%)       | 2,745 (4.7%)            |                            |
| Very high resource utilization                 | 1,230 (8.5%)        | 771 (1.3%)              |                            |
| Diabetes                                       | 1,500 (10.3%)       | 6,206 (10.7%)           | 0.01                       |
| Hypertension                                   | 2,685 (18.5%)       | 12,863 (22.1%)          | 0.09                       |
| Chronic obstructive pulmonary disease          | 1,469 (10.1%)       | 3,624 (6.2%)            | 0.15                       |
| Asthma                                         | 1,945 (13.4%)       | 5,906 (10.2%)           | 0.10                       |
| Congestive heart failure                       | 327 (2.2%)          | 677 (1.2%)              | 0.09                       |

**Table 2: Rates of emergency department visits and regression results for predictors of Emergency Department visits**

| Covariate                                | ED visits | Person-years | ED visits per 100 person-years (95% CI) | Adjusted rate ratios (95% CI) |
|------------------------------------------|-----------|--------------|-----------------------------------------|-------------------------------|
| HIV status                               |           |              |                                         |                               |
| Non-HIV                                  | 17967     | 57672.8      | 31.2 (29.9, 32.5)                       | 1.00                          |
| HIV                                      | 9670      | 14370.0      | 67.3 (63.6, 71.2)                       | 1.58 (1.51, 1.65)             |
| Neighborhood income quintile             |           |              |                                         |                               |
| 5 (highest)                              | 3987      | 13224.6      | 30.1 (28.3, 32.1)                       | 1.00                          |
| 4                                        | 3933      | 12101.2      | 32.5 (30.7, 34.4)                       | 1.06 (0.99, 1.13)             |
| 3                                        | 4978      | 12798.6      | 38.9 (36.3, 41.7)                       | 1.21 (1.14, 1.29)             |
| 2                                        | 5977      | 15274.5      | 39.1 (36.9, 41.5)                       | 1.23 (1.16, 1.31)             |
| 1 (lowest)                               | 8484      | 18015.8      | 47.1 (43.5, 50.9)                       | 1.35 (1.27, 1.43)             |
| Rural residence                          |           |              |                                         |                               |
| Urban residence                          | 25208     | 68225.9      | 36.9 (35.6, 38.3)                       | 1.00                          |
| Rural residence                          | 2337      | 3504.2       | 66.7 (60.7, 73.3)                       | 1.71 (1.61, 1.91)             |
| Primary care visits (prior year)         |           |              |                                         |                               |
| 0 visits                                 | 4309      | 18544.3      | 23.2 (21.6, 25)                         | 1.00                          |
| 1 to 2 visits                            | 5762      | 19538.4      | 29.5 (27.7, 31.4)                       | 1.27 (1.20, 1.34)             |
| 3 or more visits                         | 17566     | 33960.1      | 51.7 (49.4, 54.1)                       | 1.47 (1.40, 1.55)             |
| Aggregated diagnosis groups (prior year) |           |              |                                         |                               |
| 0 to 5                                   | 16263     | 60123.7      | 27.0 (26.0, 28.2)                       | 1.00                          |
| 6 to 9                                   | 7416      | 9979.9       | 74.3 (69.9, 79.0)                       | 2.29 (2.17, 2.41)             |
| 10 or more                               | 3958      | 1939.2       | 204 (184.1, 226.3)                      | 6.16 (5.60, 6.76)             |



**Table 3: Visits for ambulatory care sensitive conditions (visits per 1000 person-years)**

|                                                             | <b>Rate (95% confidence interval) of visits in persons with HIV</b> | <b>Rate (95% confidence interval) of visits in HIV-negative individuals</b> | <b>Rate ratio (95% confidence interval)</b> |
|-------------------------------------------------------------|---------------------------------------------------------------------|-----------------------------------------------------------------------------|---------------------------------------------|
| Epilepsy                                                    | 3.55 (2.64 to 4.67)                                                 | 1.08 (0.82 to 1.38)                                                         | 3.30 (2.28 to 4)                            |
| Chronic obstructive pulmonary disease                       | 6.05 (4.85 to 7.47)                                                 | 1.86 (1.52 to 2.24)                                                         | 3.26 (2.46 to 4.33)                         |
| Asthma                                                      | 3.41 (2.52 to 4.51)                                                 | 1.53 (1.22 to 1.88)                                                         | 2.24 (1.57 to 3.17)                         |
| Heart failure                                               | 2.64 (1.87 to 3.63)                                                 | 1.35 (1.07 to 1.69)                                                         | 1.96 (1.33 to 2.88)                         |
| Diabetes                                                    | 3.62 (2.70 to 4.75)                                                 | 2.10 (1.74 to 2.51)                                                         | 1.73 (1.25 to 2.39)                         |
| Dental                                                      | 5.36 (4.23 to 6.70)                                                 | 3.35 (2.89 to 3.85)                                                         | 1.60 (1.23 to 2.09)                         |
| Angina                                                      | 2.23 (1.52 to 3.14)                                                 | 1.82 (1.49 to 2.20)                                                         | 1.22 (0.82 to 1.82)                         |
| Gastroenteritis                                             | 1.39 (0.85 to 2.15)                                                 | 0.26 (0.15 to 0.43)                                                         | 5.35 (2.74 to 10.45)                        |
| Hypertension                                                | 1.39 (0.85 to 2.15)                                                 | 1.72 (1.40 to 2.09)                                                         | 0.81 (0.50 to 1.31)                         |
| Cellulitis                                                  | 27.00 (24.38 to 29.83)                                              | 6.92 (6.26 to 7.63)                                                         | 3.90 (3.39 to 4.49)                         |
| Ear nose and throat (including upper respiratory infection) | 14.41 (12.51 to 16.51)                                              | 6.95 (6.29 to 7.67)                                                         | 2.07 (1.75 to 2.45)                         |

**Table 4: Characteristics of emergency department visits by HIV status**

| Covariate                                      | HIV<br>(n = 9,670) | Non-HIV<br>(n = 38,670) | Standardized<br>difference |
|------------------------------------------------|--------------------|-------------------------|----------------------------|
| Mean age ± SD (years)                          | 45.62 ± 12.04      | 45.62 ± 12.03           | 0.01                       |
| 18 to 25 years                                 | 279 (2.9%)         | 1,122 (2.9%)            |                            |
| 26 to 35 years                                 | 1,656 (17.1%)      | 6,762 (17.5%)           |                            |
| 36 to 45 years                                 | 3,034 (31.4%)      | 12,030 (31.1%)          |                            |
| 46 to 55 years                                 | 2,921 (30.2%)      | 11,758 (30.4%)          |                            |
| >55 years                                      | 1,780 (18.4%)      | 6,998 (18.1%)           |                            |
| Sex                                            |                    |                         |                            |
| Female                                         | 2,260 (23.4%)      | 9,040 (23.4%)           | 0.00                       |
| Male                                           | 7,410 (76.6%)      | 29,630 (76.6%)          |                            |
| Income quintile                                |                    |                         |                            |
| 5 (highest)                                    | 1,222 (12.6%)      | 5,833 (15.2%)           | 0.28                       |
| 4                                              | 1,126 (11.6%)      | 6,184 (16.1%)           |                            |
| 3                                              | 1,623 (16.8%)      | 6,832 (17.8%)           |                            |
| 2                                              | 1,918 (19.8%)      | 8,612 (22.5%)           |                            |
| 1 (lowest)                                     | 3,646 (37.7%)      | 10,860 (28.3%)          |                            |
| Rural residence                                | 657 (6.8%)         | 3,269 (8.5%)            | 0.08                       |
| Primary care physician visits in the past year |                    |                         |                            |
| Mean ± standard deviation                      | 10.2 ± 13.7        | 6.3 ± 10.0              | 0.37                       |
| Visit severity                                 |                    |                         |                            |
| Non-urgent                                     | 475 (4.9%)         | 1,851 (4.8%)            | 0.09                       |
| Less urgent                                    | 2,723 (28.2%)      | 12,430 (32.1%)          |                            |
| Urgent                                         | 4,406 (45.6%)      | 16,816 (43.5%)          |                            |
| Emergent                                       | 1,960 (20.3%)      | 7,235 (18.7%)           |                            |
| Resuscitation                                  | 78 (0.8%)          | 250 (0.6%)              |                            |
| Emergency room volume                          |                    |                         |                            |
| High volume                                    | 7,418 (76.7%)      | 29,950 (77.5%)          | 0.02                       |
| Low volume                                     | 479 (5.0%)         | 1,837 (4.8%)            |                            |
| Medium volume                                  | 1,773 (18.3%)      | 6,883 (17.8%)           |                            |
| Teaching hospital                              | 5,206 (53.8%)      | 11,220 (29.0%)          | 0.54                       |
| Minutes in the ED                              |                    |                         |                            |
| Mean ± standard deviation                      | 367.0 ± 498.7      | 271.0 ± 361.7           | 0.24                       |

**Table 5: Regression for hospitalization after emergency department presentation**

| Covariate                        | Hospital admissions | Visits | Percent (%)<br>(95% CI) | Adjusted odds ratio<br>(95% CI) |
|----------------------------------|---------------------|--------|-------------------------|---------------------------------|
| HIV status                       |                     |        |                         |                                 |
| Non-HIV                          | 3703                | 38670  | 9.6 (9.3, 9.9)          | 1.00                            |
| HIV                              | 1513                | 9670   | 15.6 (14.9, 16.4)       | 1.55 (1.43, 1.69)               |
| Income quintile                  |                     |        |                         |                                 |
| 5 (highest)                      | 746                 | 7055   | 10.6 (9.9, 11.3)        | 1.00                            |
| 4                                | 728                 | 7310   | 10.0 (9.3, 10.6)        | 0.96 (0.85, 1.08)               |
| 3                                | 891                 | 8455   | 10.5 (9.9, 11.2)        | 0.98 (0.87, 1.10)               |
| 2                                | 1115                | 10530  | 10.6 (10.0, 11.2)       | 0.98 (0.88, 1.09)               |
| 1 (lowest)                       | 1681                | 14506  | 11.6 (11.1, 12.1)       | 1.00 (0.90, 1.11)               |
| Rural residency status           |                     |        |                         |                                 |
| Urban residence                  | 4906                | 44352  | 11.1 (10.8, 11.4)       | 1.00                            |
| Rural residence                  | 306                 | 3926   | 7.8 (7.0, 8.6)          | 1.13 (0.97, 1.32)               |
| Aggregated diagnosis groups      |                     |        |                         |                                 |
| 0 to 5                           | 2717                | 30728  | 8.8 (8.5, 9.2)          | 1.00                            |
| 6 to 9                           | 1523                | 11901  | 12.8 (12.2, 13.4)       | 1.31 (1.22, 1.41)               |
| 10 or more                       | 976                 | 5711   | 17.1 (16.1, 18.1)       | 1.69 (1.53, 1.87)               |
| Canadian Triage and Acuity Scale |                     |        |                         |                                 |
| Non-urgent                       | 23                  | 2326   | 1.0 (0.6, 1.4)          | 1.00                            |
| Less urgent                      | 260                 | 15153  | 1.7 (1.5, 1.9)          | 1.84 (1.25, 2.70)               |
| Urgent                           | 2329                | 21222  | 11.0 (10.6, 11.4)       | 12.08 (8.31, 17.57)             |
| Emergent                         | 2396                | 9195   | 26.1 (25.2, 27.0)       | 34.38 (23.60, 50.09)            |
| Resuscitation                    | 199                 | 328    | 60.7 (55.4, 66.0)       | 156.73 (101.34, 236.9)          |
| Emergency department volume      |                     |        |                         |                                 |
| Low volume                       | 175                 | 2316   | 7.6 (6.5, 8.6)          | 1.00                            |
| Medium volume                    | 753                 | 8656   | 8.7 (8.1, 9.3)          | 0.63 (0.52, 0.77)               |
| High volume                      | 4288                | 37368  | 11.5 (11.2, 11.8)       | 0.61 (0.50, 0.74)               |
| Teaching hospital                |                     |        |                         |                                 |
| Nonteaching hospital             | 3112                | 31914  | 9.8 (9.4, 10.1)         | 1.00                            |
| Teaching hospital                | 2104                | 16426  | 12.8 (12.3, 13.3)       | 1.12 (1.04, 1.20)               |

1  
2  
3  
4  
5  
6  
7  
8  
9  
10  
11  
12  
13  
14  
15  
16  
17  
18  
19  
20  
21  
22  
23  
24  
25  
26  
27  
28  
29  
30  
31  
32  
33  
34  
35  
36  
37  
38  
39  
40  
41  
42  
43  
44  
45  
46  
47  
48  
49  
50  
51  
52  
53  
54  
55  
56  
57  
58  
59  
60

**Figure Legend**

Figure 1: Hospital admission following emergency department visit, stratified by visit acuity

Confidential

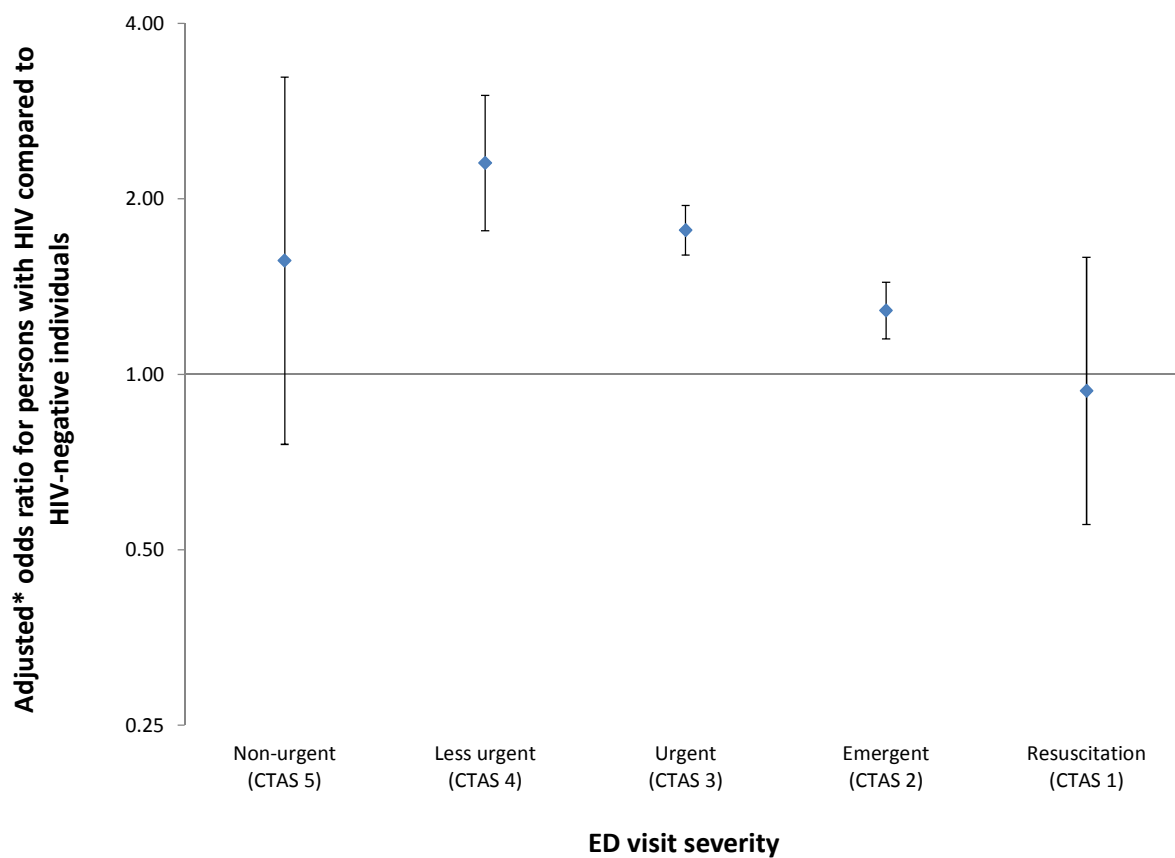

\*Adjusted for: socioeconomic status, urban versus rural residence, patient co-morbidity, emergency department volume and whether the emergency department was located within an academic teaching hospital

**Supplemental Table 1: Reasons for emergency department visit (visits per 1000 person-years)**

|                                  | <b>Rate (95% confidence interval) in persons with HIV</b> | <b>Rate (95% confidence interval) in HIV-negative individuals</b> | <b>Rate ratio (95% confidence interval)</b> |
|----------------------------------|-----------------------------------------------------------|-------------------------------------------------------------------|---------------------------------------------|
| Infectious diseases              | 87.27 (82.50 to 92.23)                                    | 21.55 (20.37 to 22.78)                                            | 4.05 (3.74 to 4.38)                         |
| Injuries/trauma                  | 86.01 (81.28 to 90.94)                                    | 59.47 (57.50 to 61.50)                                            | 1.45 (1.36 to 1.54)                         |
| Mental health illness            | 62.21 (58.20 to 66.43)                                    | 19.73 (18.60 to 20.91)                                            | 3.15 (2.89 to 3.44)                         |
| Respiratory                      | 51.29 (47.65 to 55.13)                                    | 20.06 (18.92 to 21.25)                                            | 1.97 (1.66 to 2.33)                         |
| Musculoskeletal                  | 42.10 (38.81 to 45.59)                                    | 26.11 (24.81 to 27.47)                                            | 1.61 (1.47 to 1.77)                         |
| Digestive, including oral cavity | 41.34 (38.08 to 44.80)                                    | 20.32 (19.17 to 21.52)                                            | 2.03 (1.84 to 2.25)                         |
| Genitourinary/renal              | 20.39 (18.12 to 22.86)                                    | 10.80 (9.97 to 11.68)                                             | 1.89 (1.64 to 2.17)                         |
| Circulatory system               | 19.62 (17.40 to 22.05)                                    | 13.39 (12.46 to 14.36)                                            | 1.47 (1.28 to 1.68)                         |
| Neurologic                       | 12.11 (10.38 to 14.05)                                    | 5.17 (4.60 to 5.79)                                               | 2.34 (1.94 to 2.83)                         |

Supplementary Table 2: Regression results for predictors of emergency department (ED) visits, by visit acuity\*

| Covariate                       | High urgency ED visits |              |                                         |                               |  | Low urgency ED visits |              |                                                  |                               |  |
|---------------------------------|------------------------|--------------|-----------------------------------------|-------------------------------|--|-----------------------|--------------|--------------------------------------------------|-------------------------------|--|
|                                 | ED visits              | Person-years | ED visits per 100 person-years (95% CI) | Adjusted rate ratios (95% CI) |  | ED visits             | Person-years | ED visits per 100 person-years patients (95% CI) | Adjusted rate ratios (95% CI) |  |
| HIV status                      |                        |              |                                         |                               |  |                       |              |                                                  |                               |  |
| Non-HIV                         | 11465                  | 57672.8      | 19.9 (19.1, 20.7)                       | 1.00                          |  | 6465                  | 57672.8      | 11.2 (10.5, 11.9)                                | 1.00                          |  |
| HIV                             | 6444                   | 14370        | 44.8 (42.4, 47.5)                       | 1.61 (1.53, 1.69)             |  | 3198                  | 14370.0      | 22.3 (20.6, 24.0)                                | 1.55 (1.45, 1.65)             |  |
| Income quintile                 |                        |              |                                         |                               |  |                       |              |                                                  |                               |  |
| 5 (highest)                     | 2565                   | 13224.6      | 19.4 (18.1, 20.7)                       | 1.00                          |  | 1409                  | 13224.6      | 10.7 (9.8, 11.6)                                 | 1.00                          |  |
| 4                               | 2464                   | 12101.2      | 20.4 (19.1, 21.7)                       | 1.03 (0.95, 1.11)             |  | 1461                  | 12101.2      | 12.1 (11.1, 13.1)                                | 1.12 (1.01, 1.23)             |  |
| 3                               | 3178                   | 12798.6      | 24.8 (23.1, 26.7)                       | 1.19 (1.11, 1.28)             |  | 1793                  | 12798.6      | 14.0 (12.7, 15.4)                                | 1.26 (1.15, 1.38)             |  |
| 2                               | 3853                   | 15274.5      | 25.2 (23.7, 26.8)                       | 1.22 (1.13, 1.31)             |  | 2111                  | 15274.5      | 13.8 (12.7, 15.1)                                | 1.27 (1.16, 1.39)             |  |
| 1 (lowest)                      | 5679                   | 18015.8      | 31.5 (29.1, 34.1)                       | 1.38 (1.29, 1.48)             |  | 2783                  | 18015.8      | 15.4 (14, 17.1)                                  | 1.31 (1.18, 1.43)             |  |
| Rural residence                 |                        |              |                                         |                               |  |                       |              |                                                  |                               |  |
| Urban residence                 | 16924                  | 68225.9      | 24.8 (23.9, 25.8)                       | 1.00                          |  | 1377                  | 3504.2       | 39.3 (34.6, 44.6)                                | 1.00                          |  |
| Rural residence                 | 933                    | 3504.15      | 26.6 (24.2, 29.3)                       | 1.13 (1.01, 1.25)             |  | 40                    | 312.8        | 12.8 (4.4, 37.0)                                 | 2.85 (2.54, 3.19)             |  |
| Primary care visits (past year) |                        |              |                                         |                               |  |                       |              |                                                  |                               |  |
| 0 visits                        | 2604                   | 18544.3      | 14.0 (13.0, 15.2)                       | 1.00                          |  | 1697                  | 18544.3      | 9.2 (8.4, 10.0)                                  | 1.00                          |  |
| 1 to 2 visits                   | 3595                   | 19538.4      | 18.4 (17.2, 19.7)                       | 1.30 (1.22, 1.39)             |  | 2149                  | 19538.4      | 11.0 (10.1, 11.9)                                | 1.22 (1.12, 1.32)             |  |
| 3 or more visits                | 11710                  | 33960.1      | 34.5 (33.0, 36.0)                       | 1.51 (1.42, 1.61)             |  | 5817                  | 33960.1      | 17.1 (16.0, 18.3)                                | 1.38 (1.28, 1.49)             |  |
| Aggregated diagnosis groups     |                        |              |                                         |                               |  |                       |              |                                                  |                               |  |
| 0 to 5                          | 9973                   | 60123.7      | 16.6 (16.0, 17.2)                       | 1.00                          |  | 6246                  | 60123.7      | 10.4 (9.8, 11.0)                                 | 1.00                          |  |
| 6 to 9                          | 5145                   | 9979.93      | 51.6 (48.5, 54.8)                       | 2.54 (2.39, 2.69)             |  | 2257                  | 9979.9       | 22.6 (20.6, 24.8)                                | 1.84 (1.71, 1.99)             |  |
| 10 or more                      | 2791                   | 1939.23      | 144.0 (129.9, 159.4)                    | 6.98 (6.30, 7.74)             |  | 1160                  | 1939.2       | 59.8 (51.4, 69.6)                                | 4.62 (4.06, 5.26)             |  |

\*Categorized using Canadian Triage And Acuity Scale (CTAS); low urgency were visits triaged as CTAS 4 (less urgent) or CTAS 5 (non-urgent), whereas high urgency visits were visits triaged as CTAS 1 (resuscitation required), CTAS 2 (emergent care required) or CTAS 3 (urgent care required)
